# Supplementary material for: Microglial Depletion Has No Impact on Disease Progression in a Mouse Model of Machado–Joseph Disease
Source: MDPI journal article supplement (doi:10.3390/cells11132022), 2022-06-25
Supplement: s1 [file s1]

## Supplementary Data of the Results

### **“Microglial depletion has no impact on disease progression in a mouse model of Machado-Joseph disease”**

by Campos et al., 2022

#### **Contents within the present file:**

##### **1. Supplementary Figures:**

**Figure S1.** Features associated with microglial ramification in the pontine nuclei (PN) were found to be similar between the four groups.

**Figure S2.** Features associated with complexity and shape of microglia in the deep cerebellar nuclei (DCN) were not found to be different between the four groups.

**Figure S3.** Features associated with complexity and shape of microglia in the PN were found to be similar between the four groups.

**Figure S4.** Treatment with PLX3397 did not induce morphological changes in the features relevant to microglia ramification in the DCN of CMVMJD135 mice at 21 weeks of age.

**Figure S5.** Treatment with PLX3397 did not induce morphological changes in the features relevant to complexity and microglia shape in the DCN of CMVMJD135 mice at 21 weeks of age.

**Figure S6.** Treatment with PLX3397 did not induce morphological changes in the features relevant to microglia ramification in the PN of CMVMJD135 mice at 21 weeks of age.

**Figure S7.** Treatment with PLX3397 did not induce morphological changes in the features relevant to complexity and microglia shape in the PN of CMVMJD135 mice at 21 weeks of age.

**Figure S8.** In both affected brain regions, CSF1R inhibition by PLX3397 on wild-type (WT) mice promoted morphological changes that led to microglia becoming closer to those of CMVMJD135 mice (PLX3397- and vehicle-treated)

## 1. Supplementary Figures

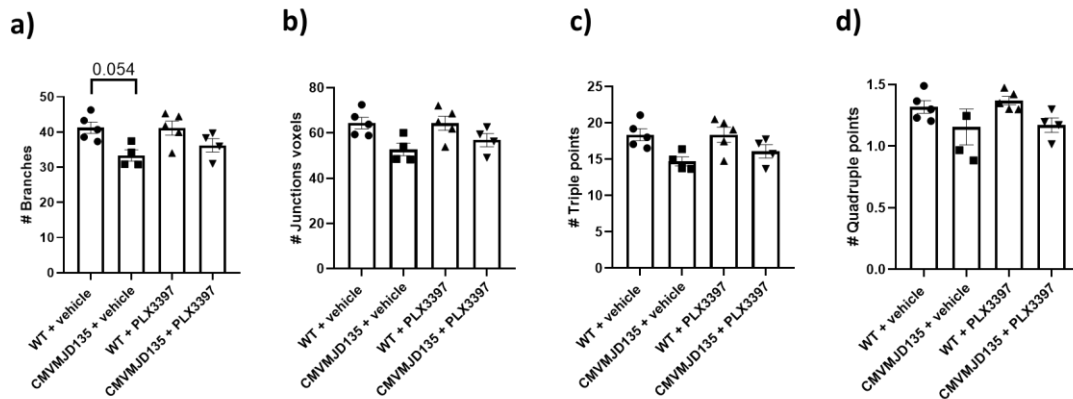

**Figure S1. Features associated with microglial ramification in the pontine nuclei (PN) were found to be similar between the four groups.** Quantification of the morphometric parameters associated with microglia ramification including: **a)** # branches; **b)** # junctions voxels; **c)** # triple points; and **d)** # quadruple points. Data of all these parameters were obtained from: 210 microglial cells from WT + vehicle mice (n=4); 217 microglial cells from CMVMJD135 + vehicle mice (n=4); 248 microglial cells from WT + PLX3397 mice (n=5); and 235 microglial cells from CMVMJD135 + PLX3397 mice (n=5). Data are presented as mean + SEM, One-way ANOVA (Post hoc Tukey's test).

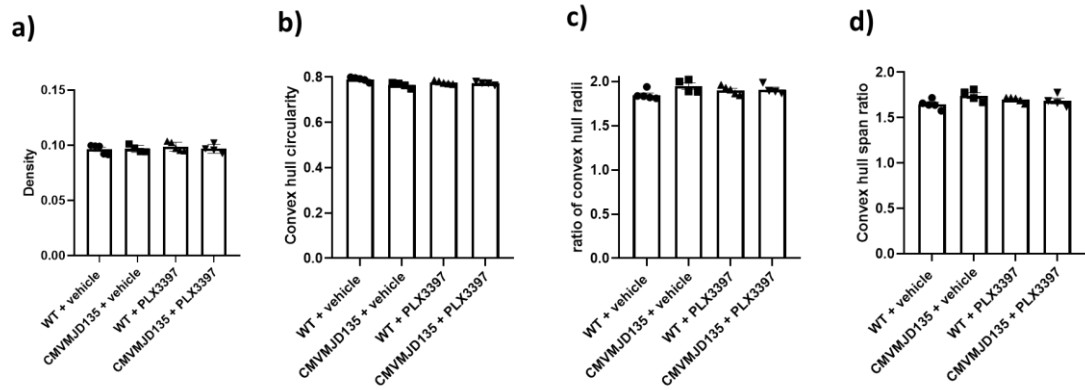

**Figure S2. Features associated with complexity and shape of microglia in the deep cerebellar nuclei (DCN) were not found to be different between the four groups.** Quantification of the morphometric parameters associated with soma thickness: **a)** density. Associated with cell size: **b)** convex hull circularity. Associated with the cylindrical shape of cells: **c)** ratio of convex hull radii; and **d)** convex hull span ratio. Data of all these parameters were obtained from: 387 microglial cells from WT + vehicle mice (n=5); 256 microglial cells from CMVMJD135 + vehicle mice (n=4); 475 microglial cells from WT + PLX3397 mice (n=5); and 263 microglial cells from CMVMJD135 + PLX3397 mice (n=4). Data are presented as mean + SEM, One-way ANOVA (Post hoc Tukey's test).

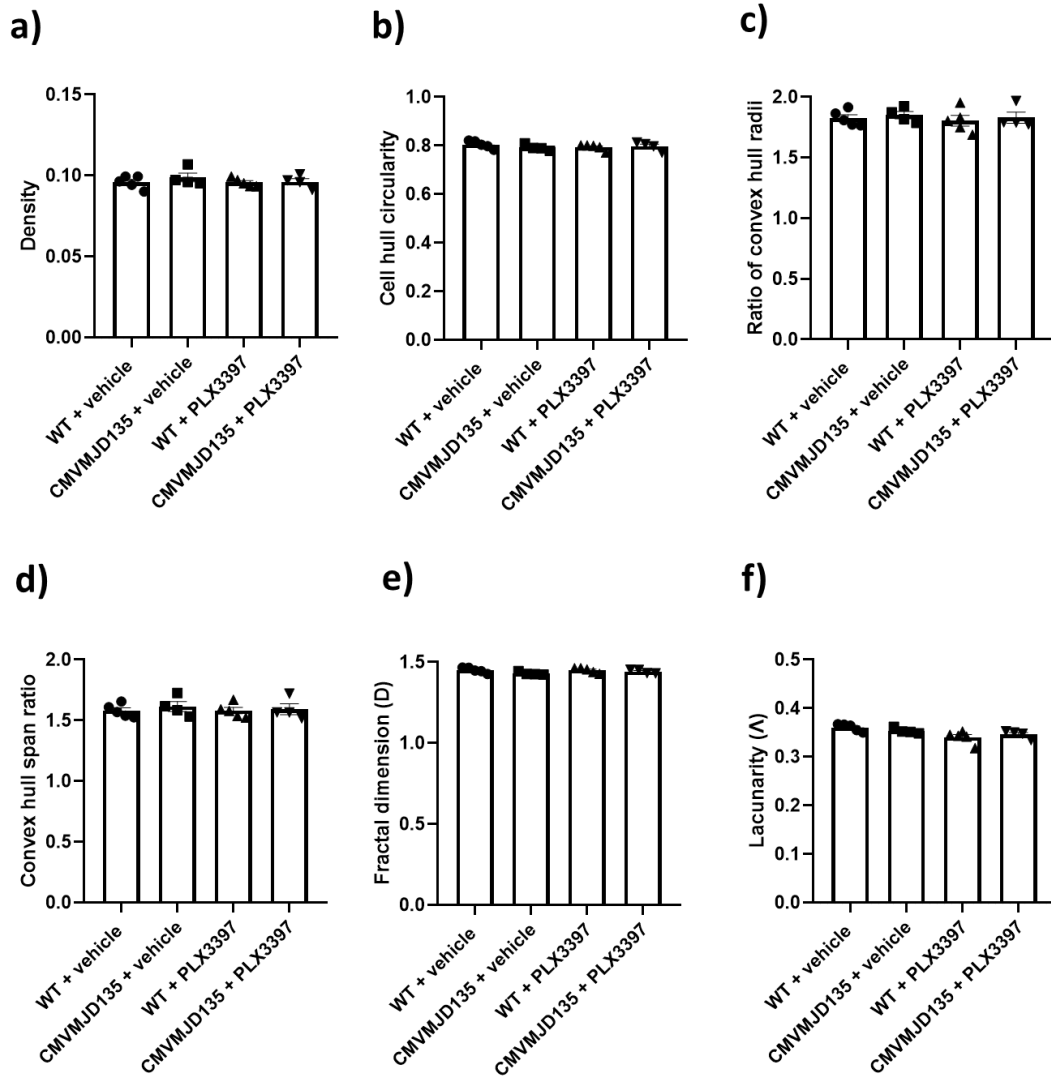

**Figure S3. Features associated with complexity and shape of microglia in the PN were found to be similar between the four groups.** **a)** Quantification of the morphometric parameters associated with soma thickness: **a)** density. Associated with cell size: **b)** convex hull circularity. Associated with the cylindrical shape of cells: **c)** ratio of convex hull radii; and **d)** convex hull span ratio. Associated with the complexity of their ramifications: **e)** fractal dimension. Associated with the heterogeneity of their shape: **f)** lacunarity. Data of all these parameters were obtained from: 210 microglial cells from WT + vehicle mice (n=4); 217 microglial cells from CMVMJD135 + vehicle mice (n=4); 248 microglial cells from WT + PLX3397 mice (n=5); and 235 microglial cells from CMVMJD135 + PLX3397 mice (n=5). Data are presented as mean + SEM, One-way ANOVA (Post hoc Tukey's test).

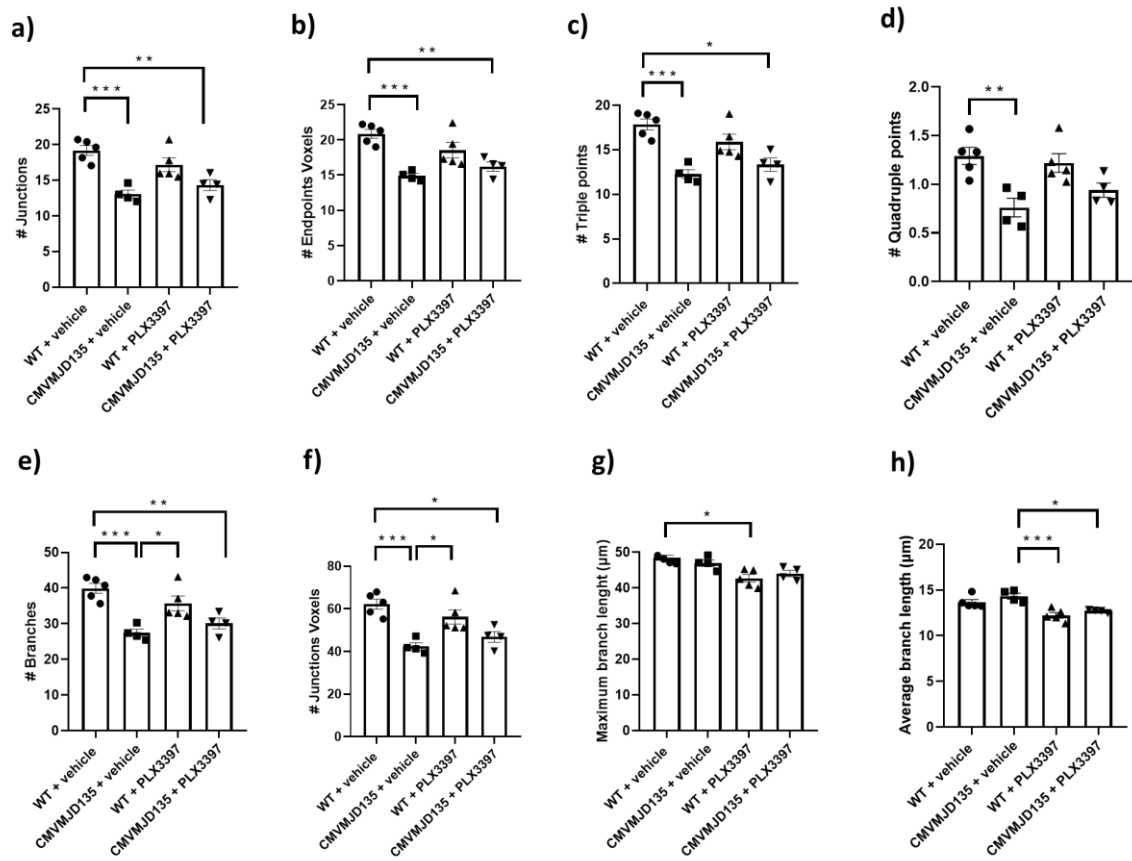

**Figure S4. Treatment with PLX3397 did not induce morphological changes in the features relevant to microglia ramification in the DCN of CMVMJD135 mice at 21 weeks of age.** Quantification of the morphometric parameters associated to microglia ramification, including: **a)** # junctions; **b)** # endpoints voxels; **c)** # triple points; **d)** # quadruple points; **e)** # branches; **f)** # junctions voxels; **g)** maximum branch length; and **h)** average branch length. Data of all these parameters were obtained from: 387 microglial cells from WT + vehicle mice (n=5); 256 microglial cells from CMVMJD135 + vehicle mice (n=4); 475 microglial cells from WT + PLX3397 mice (n=5); and 263 microglial cells from CMVMJD135 + PLX3397 mice (n=4). Data are presented as mean + SEM, One-way ANOVA (Post hoc Tukey's test). \*, \*\*, \*\*\*, represent  $p < 0.05$ ,  $p < 0.01$ , and  $p < 0.001$ , respectively.

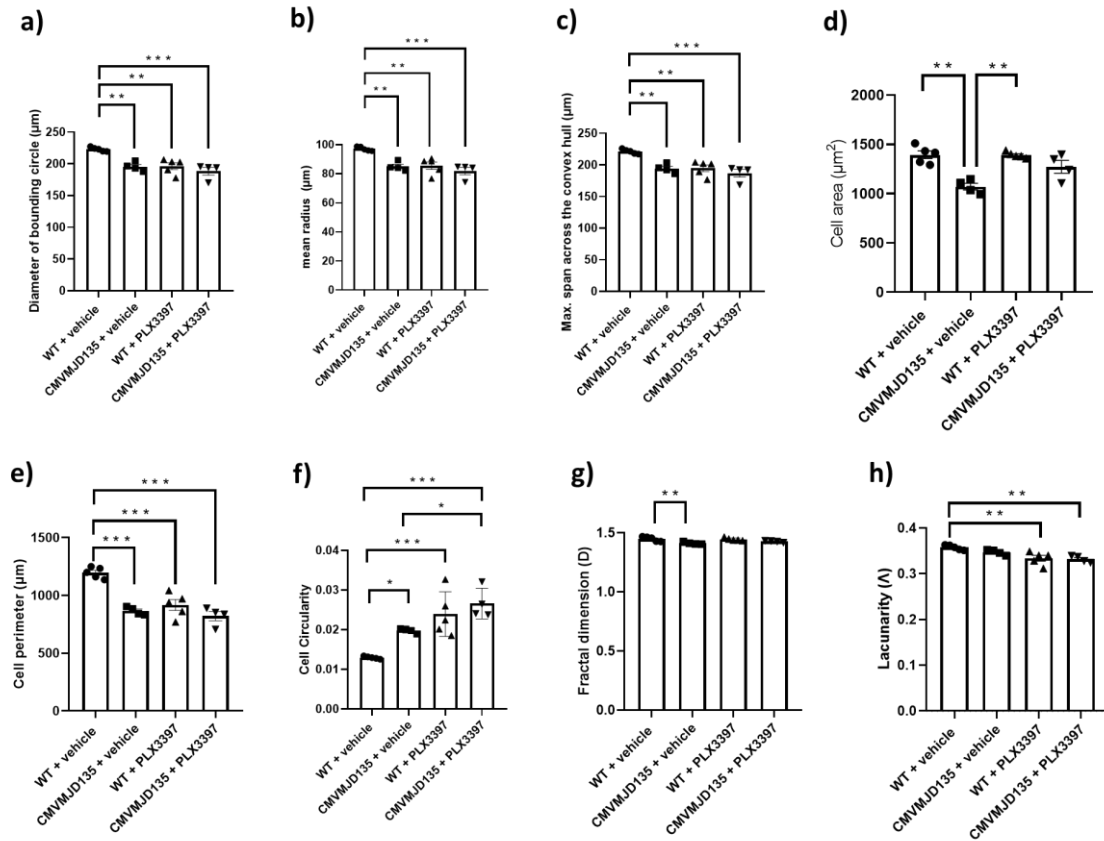

**Figure S5. Treatment with PLX3397 did not induce morphological changes in the features relevant to complexity and microglia shape in the DCN of CMVMJD135 mice at 21 weeks of age.** Quantification of the morphometric parameters associated with cell size: **a)** diameter of the bounding circle; **b)** mean radius; **c)** maximum span across the convex hull; and **d)** cell area. Associated with cell surface: **e)** cell perimeter. Associated with soma thickness: **f)** cell circularity. Associated with complexity of the ramifications: **g)** fractal dimension. Associated with heterogeneity of the shape: **h)** lacunarity. Data of all these parameters were obtained from: 387 microglial cells from WT + vehicle mice (n=5); 256 microglial cells from CMVMJD135 + vehicle mice (n=4); 475 microglial cells from WT + PLX3397 mice (n=5); and 263 microglial cells from CMVMJD135 + PLX3397 mice (n=4). Data are presented as mean + SEM, One-way ANOVA (Post hoc Tukey's test). \*, \*\*, \*\*\*, represent  $p < 0.05$ ,  $p < 0.01$ , and  $p < 0.001$ , respectively.

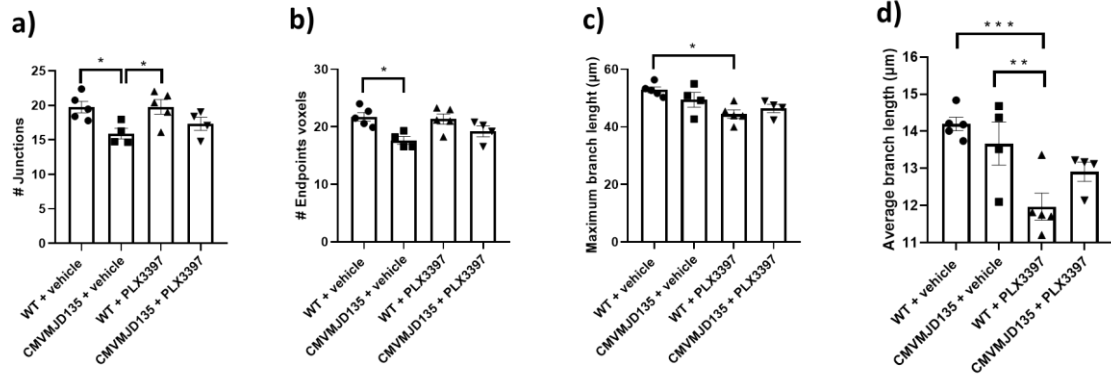

**Figure S6. Treatment with PLX3397 did not induce morphological changes in the features relevant to microglia ramification in the PN of CMVMJD135 mice at 21 weeks of age.** Quantification of the morphometric parameters associated to microglia ramification, including: **a)** # junctions; **b)** # endpoints voxels; **c)** maximum branch length; and **d)** average branch length. Data of all these parameters were obtained from: 210 microglial cells from WT + vehicle mice (n=4); 217 microglial cells from CMVMJD135 + vehicle mice (n=4); 248 microglial cells from WT + PLX3397 mice (n=5); and 235 microglial cells from CMVMJD135 + PLX3397 mice (n=5). Data are presented as mean+SEM, One-way ANOVA (Post hoc Tukey's test). \*, \*\*, \*\*\*, represent  $p < 0.05$ ,  $p < 0.01$  and  $p < 0.001$ , respectively.

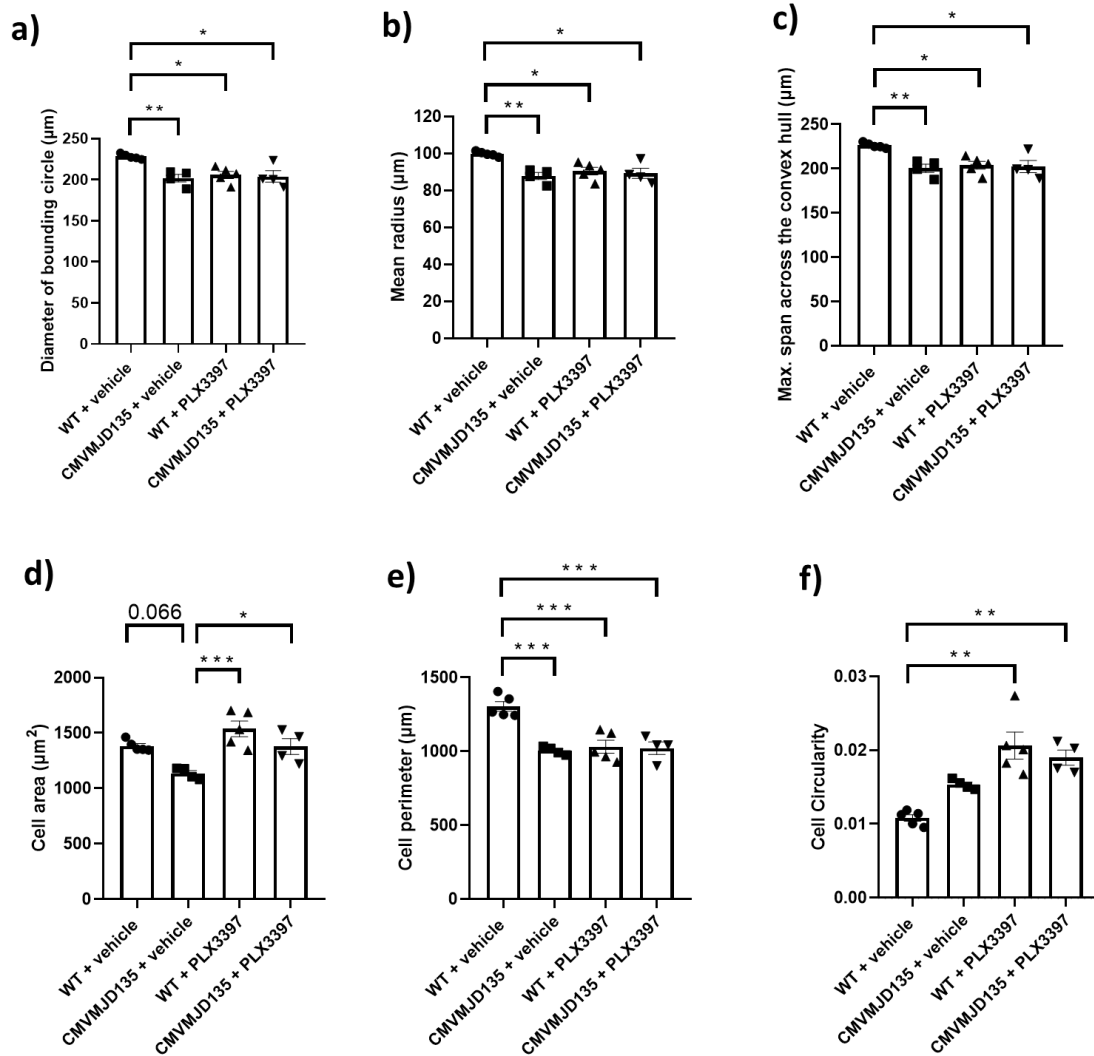

**Figure S7. Treatment with PLX3397 did not induce morphological changes in the features relevant to complexity and microglia shape in the PN of CMVMJD135 mice at 21 weeks of age.** Quantification of the morphometric parameters associated with cell size: **a)** diameter of the bounding circle; **b)** mean radius; **c)** maximum span across the convex hull; and **d)** cell area. Associated with cell surface: **e)** cell perimeter. Associated with soma thickness: **f)** cell circularity. Data of all these parameters were obtained from: 210 microglial cells from WT + vehicle mice (n=4); 217 microglial cells from CMVMJD135 + vehicle mice (n=4); 248 microglial cells from WT + PLX3397 mice (n=5); and 235 microglial cells from CMVMJD135 + PLX3397 mice (n=5). Data are presented as mean+SEM, One-way ANOVA (Post hoc Tukey's test). \*, \*\*, \*\*\*, represent  $p < 0.05$ ,  $p < 0.01$  and  $p < 0.001$ , respectively.



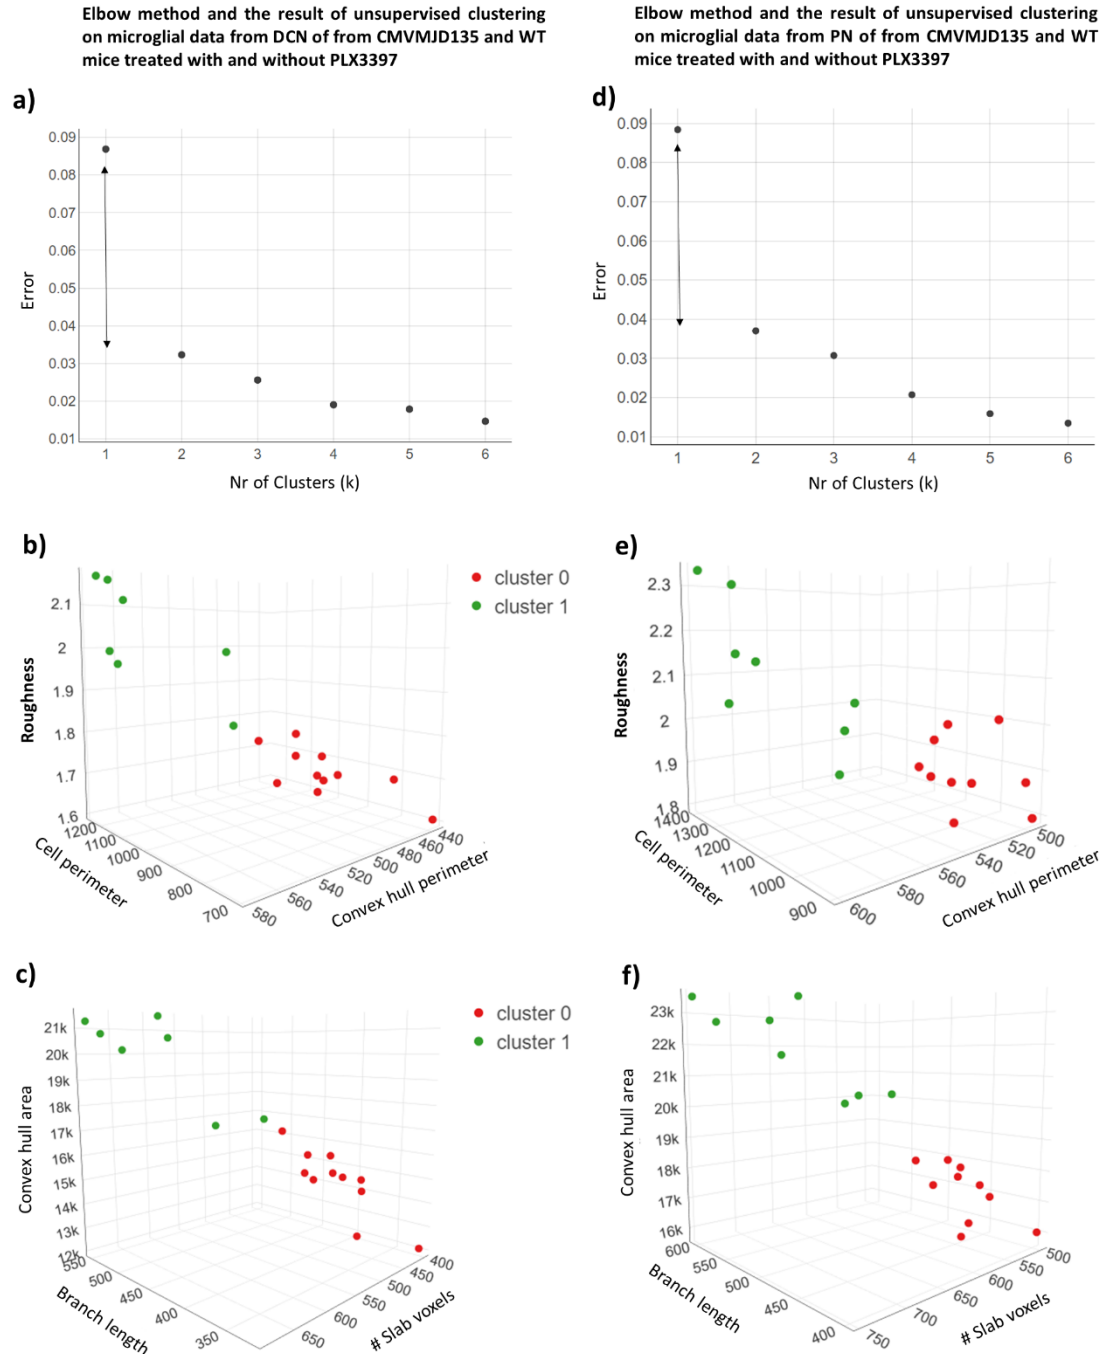

**Figure S8.** In both affected brain regions, CSF1R inhibition by PLX3397 on wild-type (WT) mice promoted morphological changes that led to microglia becoming closer to those of CMVMJD135 mice (PLX3397- and vehicle-treated). Graphical result of the elbow method applied on the dataset comprised of **a)** 1381 single microglial cells for the DCN and **d)** of 910 for the PN, using all statistically significant parameters found in microglia from the DCN (twenty-two parameters) and from the PN (sixteen parameters). **b, c, e, f)** All mice of four groups were plotted on a 3D space, belonging to one of two

clusters: cluster 0, in red, or cluster 1, in green. **b, e)** 3D scatter plots showing the relationship between roughness, cell perimeter, and convex hull perimeter. **c, f)** 3D scatter plots showing the relationship between convex hull area, total branch length, and number of slab voxels. **b, c)** Except for the two WT + PLX3397 mice that are clustered together with WT + vehicle mice in the DCN, and **e, f)** for the two WT + PLX3397 mice plus one CMVMJD135 + PLX3397 mouse in the PN, cluster 1 is composed of WT + vehicle mice, while cluster 0 is composed of animals of the remaining groups (CMVMJD135 + vehicle, WT + PLX3397, and CMVMJD135 + PLX3397).
