# Supplementary material for: Microglial Depletion Has No Impact on Disease Progression in a Mouse Model of Machado–Joseph Disease
Source: MDPI journal article supplement (doi:10.3390/cells11132022), 2022-06-25
Supplement: s1 [file s1]

## **Supplementary Information of the Materials and Methods**

### **“Microglial depletion has no impact on disease progression in a mouse model of Machado-Joseph disease”**

by Campos et al., 2022

#### **Contents within the present file:**

##### **1. Supplementary Figures:**

**Figure S1.** Schematic representation of the experimental design.

##### **2. Supplementary References**

## 1. Supplementary Figures

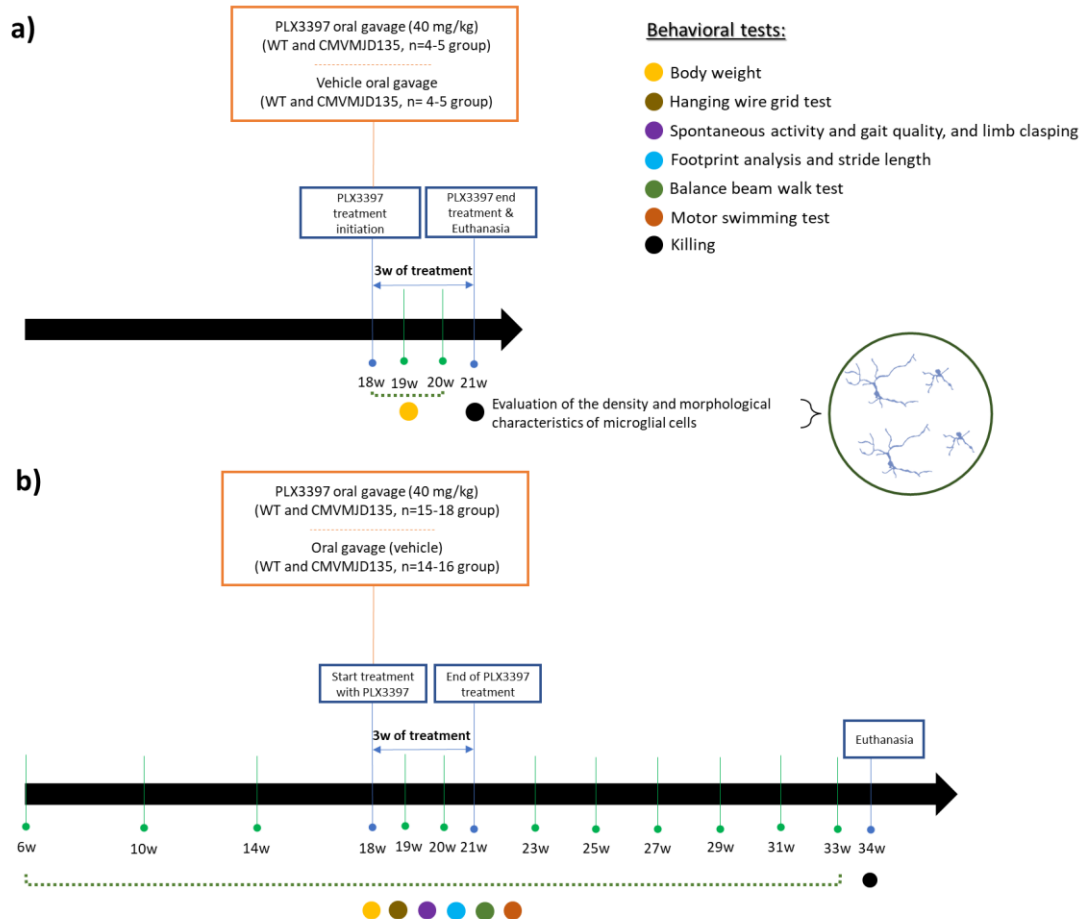

**Figure S1. Schematic representation of the experimental design.** The administration of PLX3397 was delivered to CMVMJD135 and wild-type (WT) mice every day by oral gavage at a dose of 40 mg/kg dissolved in 5 % DMSO and 25 % PEG300 in ddH<sub>2</sub>O [47], from 18 to 21 weeks of age. Control animals (CMVMJD135 and WT) were given vehicle (5 % DMSO and 25 % PEG300 in ddH<sub>2</sub>O) with the same frequency and route of administration [47]. Three weeks after treatment, groups of **a)** 4-5 animals per genotype/treatment were submitted to evaluation of density and morphological characteristics of microglial cells; and of **b)** 14-18 animals per genotype/treatment were used for behavioral analysis that were performed from week 6 to week 33.

## **2. Supplementary References**

- [47] Merry, T.L., Brooks, A.E.S., Masson, S.W., Adams, S.E., Jaiswal, J.K., Jamieson, S.M.F., Shepherd, P.R. The csf1 receptor inhibitor pexidartinib (plx3397) reduces tissue macrophage levels without affecting glucose homeostasis in mice. *International Journal of Obesity* 44(1), 245–253 (2020). doi:10.1038/s41366-019-0355-7.
